# Supplementary material for: Phosphate-assisted one-pot synthesis of zirconium phosphate-containing mesoporous silica with unique photodegradation ability for rhodamine B
Source: Royal Society of Chemistry journal article supplement (doi:10.1039/c4ra07021f), 2014-08-26
Supplement: c4ra07021f1.pdf [file c4ra07021f1.pdf]

## *Supporting information*

### **Phosphate-assisted one-pot synthesis of zirconium-containing mesoporous silica with uniquely photodegradation ability for Rhodamine B**

Jiu-Yang Yang, Chun-Ming Zheng, Yan-Qing Wang, Ming-Lin Guo

#### **1 Characterization**

The X-ray powder diffraction (XRD) was carried out on a MiniFlex 600 instrument (Japan) with Cu K $\alpha$  radiation ( $\lambda = 1.5406 \text{ \AA}$ ) at 40 kV and 15 mA.

The small-angle X-ray scattering (SAXS) was collected on Rigaku D/MAX 2400 diffractometer equipped with a CuK $\alpha$  X-ray source operating at 40 kV and 50 mA.

TEM images were observed by a Hitachi H-7650 transmission electron microscopy and operated at 100 kV. Samples were prepared by dispersing composite in ethanol and depositing it on a carbon-coated copper grid.

X-ray fluorescence (XRF, Horiba XGT-1000WR) was used to determine the chemical compositions of ZrP-MS and Ag<sub>3</sub>PO<sub>4</sub>-MS.

Nitrogen sorption isotherms were obtained with a Quantachrome Nova volumetric adsorption analyzer at 77.3 K with samples outgassed at 150 °C for 12 h. Pore size distribution was calculated from the desorption isotherm using the BJH model and the BET surface area from the relative pressure of 0.057–0.346.

UV-visible diffuse reflectance spectra were recorded within the 190–800 nm wavelength range using a U-3010 spectrophotometer (Hitachi).

The photoluminescence and photoluminescence excitation were measured with a F-380 fluorescence spectrophotometer provided by Tianjin Gangdong Sci. & Tech. Development Co. Ltd. (China). The excitation source consisted of a 150 W Xe lamp.

## 2 Analysis

### 2.1 Pseudo-first order kinetic model

The Langmuir-Hinshelwood model is well established for photocatalysis when the concentration of pollutants is very low [1]. The relevant equations are listed as follows:

$$r = -\frac{dC}{dt} = \frac{\kappa_r KC}{1 + KC} \quad (1)$$

$$\ln \frac{C_0}{C} = kt \quad (2)$$

where  $r$  is the reaction rate,  $\kappa_r$  is the reaction rate constant,  $K$  is the adsorption coefficient, and  $C$  is the reactant concentration (eq 1). If  $C$  is very small, eq 2 is obtained.  $C_0$  and  $C$  are the concentration of reactant at time 0 and  $t$ , respectively, and  $k$  is the apparent first order rate constant. The  $k$  value is obtained from the gradient of the graph of  $\ln(C_0/C)$  versus time.

### 2.2 Terephthalic acid fluorescence probe

The terephthalic acid photoluminescence probing technique was adopted to detect hydroxyl radicals. 50mg ZrP-MS catalyst was added to 200 mL aqueous solution containing 0.01 mol/L NaOH and 3.0 mmol/L terephthalic acids. Prior to irradiation, the suspension was stirred in the dark for 20 min. 3 ml of the suspension was collected at predetermined time intervals. The suspension was centrifuged at 6000 rpm for 2 min.

## 3 Results

Transmission electron micrograph (TEM) image of  $\text{Ag}_3\text{PO}_4$ -MS in Fig. S1a revealed that the morphology of  $\text{Ag}_3\text{PO}_4$ -MS was sheets particles with thickness of ca. 100-200 nm and showed that it also had 2D-hexagonal ordering. No evident particles were observed in the nanopores of  $\text{Ag}_3\text{PO}_4$ -MS.

Fig. S1b displayed a typical type IV nitrogen sorption isotherm with an H1 hysteresis loop, which was the characteristic of mesostructure ordered from  $\text{Ag}_3\text{PO}_4$ -MS. The BET surface area was 287.5

m<sup>2</sup>/g and the total pore volume at P/P<sub>0</sub>=0.99 was 0.917 cm<sup>3</sup>/g.

The small-angle X-ray scattering (SAXS) in Fig. S2a showed five resolved peaks which indicated ordered pores. Comparison of the structural details of Ag<sub>3</sub>PO<sub>4</sub>-MS with other p6mm-type mesoporous silica, Ag<sub>3</sub>PO<sub>4</sub>-MS was a structural analogue of SBA-15 and MSU-H. The *d*-spacing of Ag<sub>3</sub>PO<sub>4</sub>-MS of 11.03 nm corresponded to a unit cell parameter *a* = 12.7 nm. The wall thickness estimated at ca. 3.9 nm. Ag<sub>3</sub>PO<sub>4</sub>-MS had a mean pore diameter 8.8 nm according to BJH (see insert in Fig. S1b). The X-ray diffraction patterns (XRD) of Ag<sub>3</sub>PO<sub>4</sub>-MS (Fig. S2b) exhibited a broad and weak diffraction peak (2θ=15–30°), which could be attributed to amorphous silica composed of the composites. Other diffraction peaks of the composites could be easily indexed to the body-centered cubic structure of Ag<sub>3</sub>PO<sub>4</sub> (JCPDS No. 06-0505). XRD pattern of Ag<sub>3</sub>PO<sub>4</sub> is very sharp; this was not consistent with the Scherrer Formula prediction. But it was still not able to be explained. Maybe it was because Ag<sub>3</sub>PO<sub>4</sub>-MS were inhomogeneous materials.

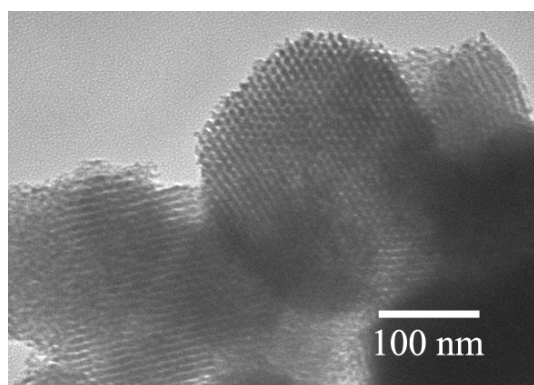

(a)

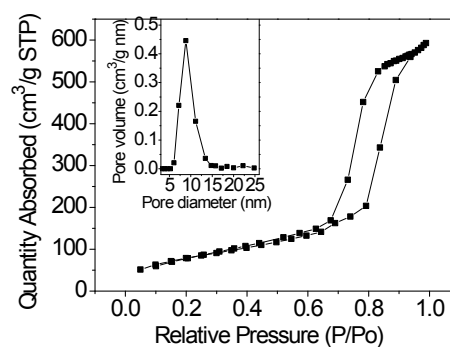

(b)

Fig. S1 (a) TEM images of Ag<sub>3</sub>PO<sub>4</sub>-MS. (b) Nitrogen adsorption isotherm of Ag<sub>3</sub>PO<sub>4</sub>-MS. Inset: BJH pore size distribution derived from the desorption branch.

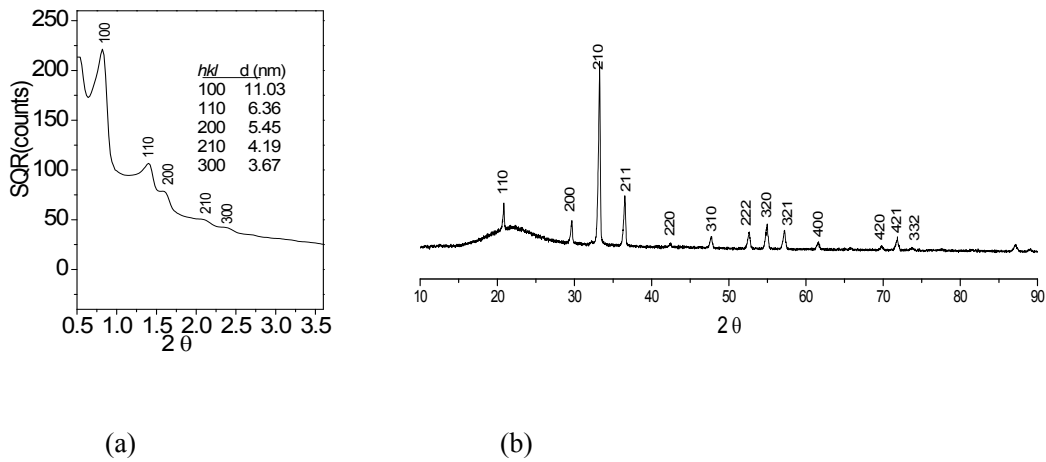

Fig. S2 (a) SAXS pattern of  $\text{Ag}_3\text{PO}_4\text{-MS}$ . (b) The XRD of  $\text{Ag}_3\text{PO}_4\text{-MS}$ .

The  $\text{Ag}_3\text{PO}_4\text{-MS}$  was characterized by X-ray photoelectron spectroscopy (XPS) techniques. Two strong peaks at 531.20 and 102.17 eV were attributed to  $\text{O}_{1s}$  and  $\text{Si}_{2p}$ , in which the O/Si atomic ratio was 1.82, implying that the silicate walls in  $\text{Ag}_3\text{PO}_4\text{-MS}$  were highly condensed. Only 1.41 atom % of  $\text{Ag}_{3d}$  was found. The  $\text{Ag}_{3d}$  peaks were composed of two individual peaks (see Fig. S4) at 374.48 and 368.58 eV, which could be attributed to  $\text{Ag}_{3d_{3/2}}$  and  $\text{Ag}_{3d_{5/2}}$  binding energies, respectively [2], but no  $\text{P}_{2p}$  peaks were observed. XRF analysis showed that the element contents of silicon, silver and phosphorus were 99.29 % in total, the Ag/P atomic ratio was determined as 3.90, suggesting the presence of some silver oxide or silver silicate species on the surface of the composites (see Table S2). Combined with the results of TEM, SAXS, XRD and nitrogen adsorption, most of  $\text{Ag}_3\text{PO}_4$  in  $\text{Ag}_3\text{PO}_4\text{-MS}$  could be in tiny particles and dispersed in its silica walls. Silver phosphate was uniformly distributed in the silica.

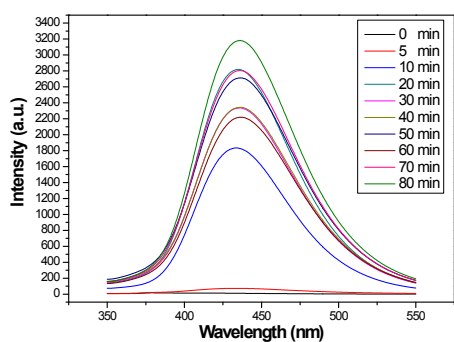

Fig. S3 The fluorescence spectra of the capture to hydroxyl radical for ZrP-MS system.

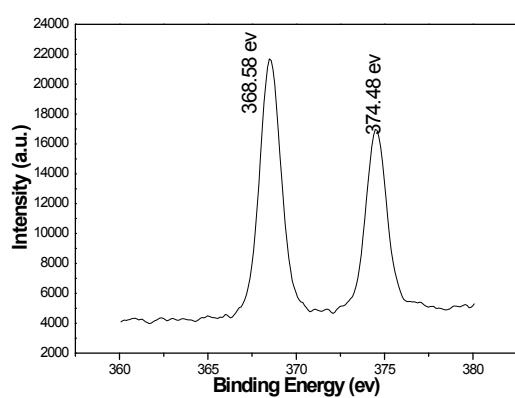

Fig. S4 XPS spectra of C 1s for Ag<sub>3</sub>PO<sub>4</sub>-MS (Ag3d)

Table S1 XRF analysis of ZrP-MS

| Element | Average content % |
|---------|-------------------|
| Si      | 70.4017           |
| Zr      | 20.7086           |
| P       | 4.8922            |
| Na      | 2.8134            |
| Hf      | 0.579             |
| Al      | 0.1856            |
| S       | 0.0114            |
| Cl      | 0.0695            |
| Fe      | 0.1408            |
| K       | 0.1191            |
| Ca      | 0.0599            |
| Ti      | 0.0029            |
| Mo      | 0.0158            |

Table S2 XRF analysis of Ag<sub>3</sub>PO<sub>4</sub>-MS

| Element | Average content % |
|---------|-------------------|
| Si      | 76.3179           |
| Ag      | 21.3965           |
| P       | 1.5745            |
| Na      | 0.085             |
| Mg      | 0.0109            |
| Al      | 0.1568            |
| S       | 0.1308            |
| Cl      | 0.0938            |
| Fe      | 0.2336            |

## References

- [1] V. A. Sakkas, I. M. Arabatzis, I. K. Konstantinou, A. D. Dimou, T. A. Albanis, P. Falaras, Appl. Catal. B, 2004, 49, 195-205.
- [2] H. Zhang, G. Wang, D. Chen, X. Lv, J. Li, Chem. Mater., 2008, 20, 6543-6549.
